# Supplementary material for: Transcriptome Sequencing Analyses between the Cytoplasmic Male Sterile Line and Its Maintainer Line in Welsh Onion (Allium fistulosum L.)
Source: PubMed Central journal article supplement (PMC4964434; doi:10.3390/ijms17071058), 2016-07-01
Supplement: ijms-17-01058-s001.pdf [file ijms-17-01058-s001.pdf]

# Supplementary Materials: Transcriptome Sequencing Analyses between the Cytoplasmic Male Sterile Line and Its Maintainer Line in Welsh Onion (*Allium fistulosum* L.)

Qianchun Liu, Yanping Lan, Changlong Wen, Hong Zhao, Jian Wang and Yongqin Wang

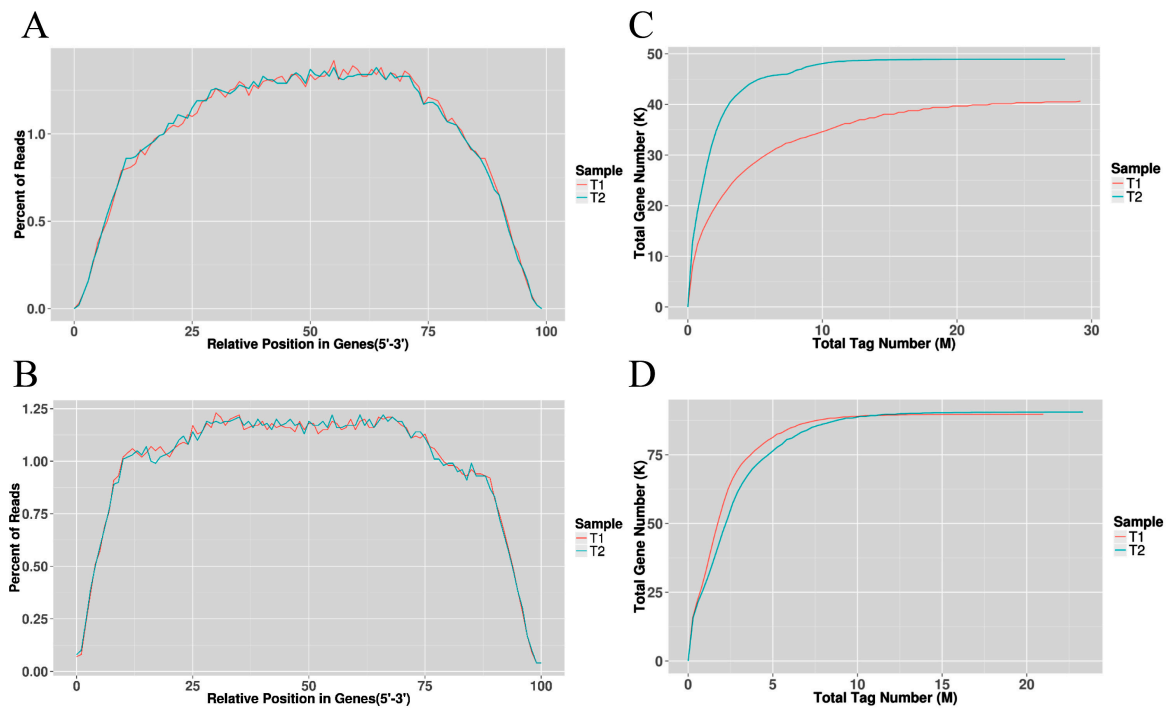

**Figure S1.** The sequencing quality testing of each sample: (A) Randomness test of cDNA fragments data from May 2013; (B) Randomness test of cDNA fragments data from May 2014; (C) Sequencing saturation analysis from May 2013; and (D) Sequencing saturation analysis from May 2014.

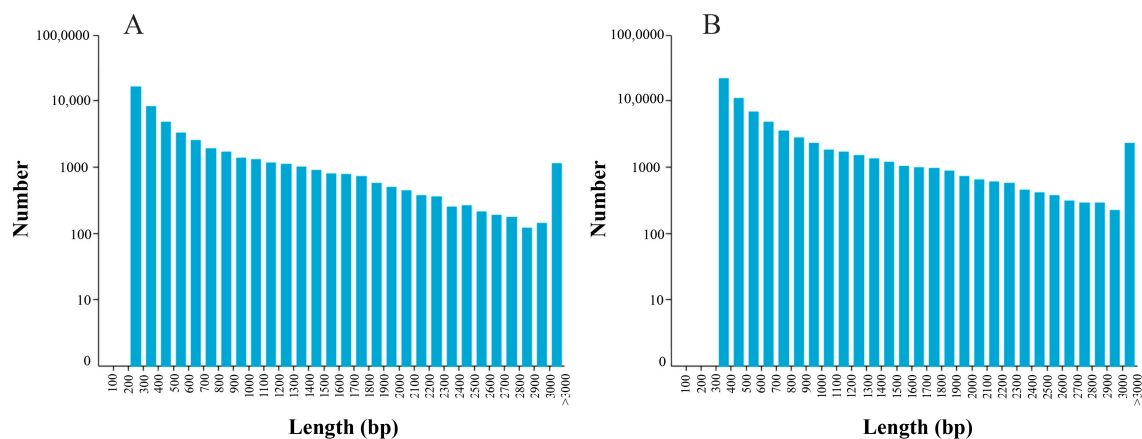

**Figure S2.** ORF (open reading frame) length distribution: (A) ORF length distribution data in May 2013; and (B) ORF length distribution data in May 2014.

**Table S1.** Length distribution of assembled contigs, transcripts, and unigenes.

| Nucleotide Length (bp) | Contigs                               |  | Transcripts                     |  | Unigenes                        |  |
|------------------------|---------------------------------------|--|---------------------------------|--|---------------------------------|--|
|                        | May 2013/May 2014                     |  | May 2013/May 2014               |  | May 2013/May 2014               |  |
| 200–300                | 2,473,748 (98.20%)/3,814,290 (97.60%) |  | 21,140 (21.74%)/57,966 (18.80%) |  | 16,261 (31.20%)/0 (0%)          |  |
| 300–500                | 17,693 (0.70%)/43,811 (1.12%)         |  | 20,653 (21.24%)/57,631 (18.69%) |  | 12,799 (24.55%)/32,039 (45.54%) |  |
| 500–1000               | 14,321 (0.57%)/28,689 (0.73%)         |  | 24,109 (24.80%)/68,847 (22.33%) |  | 10,660 (20.45%)/20,006 (28.43%) |  |
| 1000–2000              | 9866 (0.39%)/15,289 (0.39%)           |  | 21,790 (22.41%)/73,238 (23.75%) |  | 8779 (16.84%)/11,948 (16.98%)   |  |
| 2000+                  | 3541 (0.14%)/6132 (0.16%)             |  | 9538 (9.81%)/50,671 (16.43%)    |  | 3627 (6.96%)/6367 (9.05%)       |  |
| Total number           | 2,519,169/3,908,211                   |  | 97,230/308,353                  |  | 52,126/70,360                   |  |
| Total length           | 150,905,138/287,324,074               |  | 89,214,332/346,171,877          |  | 39,390,976/61,896,802           |  |
| N50 length             | 70/101                                |  | 1419/1813                       |  | 1247/1267                       |  |
| Mean length            | 59.90/73.51                           |  | 917.56/1122.648                 |  | 755.69/879.7158                 |  |

**Table S2.** Functional annotation of unigenes.

| Annotation           | Annotated Number |          | DEGSs Number |          |
|----------------------|------------------|----------|--------------|----------|
|                      | May 2013         | May 2014 | May 2013     | May 2014 |
| Nr Annotation        | 26,110           | 27,653   | 1057         | 1834     |
| Swissprot Annotation | 17,501           | 17,149   | 779          | 1296     |
| COG Annotation       | 8326             | 8201     | 312          | 529      |
| GO Annotation        | 20,599           | 17,541   | 819          | 1201     |
| KEGG Annotation      | 5907             | 5423     | 184          | 284      |
| All Annotated        | 26,262           | 29,491   | -            | -        |

**Table S3.** Primers used to perform qPCR of CMS-related gene biosynthesis and gene regulation.

| Unigene ID | Primer Sequence (5' to 3')     |
|------------|--------------------------------|
| c116086    | Forward: GGGTATCGTTGTGCTCCTGA  |
|            | Reverse: CCCCATTTTCCATCTCTGAA  |
| c175619    | Forward: TGCCATCATTTGTCTTTCCA  |
|            | Reverse: GTGCTTTCAGGCTCTTCCAG  |
| c159049    | Forward: ACTTCGCTCGCCTTCTGTC   |
|            | Reverse: CGCCTCCTGCTTTCATAGAG  |
| c160965    | Forward: CCGCTGCCAATACCAATAGT  |
|            | Reverse: CTTCGCTTACACCGCTCAAT  |
| c113452    | Forward: AGGTCTCTAAGGCAGGCAAA  |
|            | Reverse: GGA CTGAGGTGGCGAAATAC |
| c50467     | Forward: TCAAGCCGTCCAGTTTAGGA  |
|            | Reverse: CCTCACCATCATCACCATCA  |
| Actin      | Forward: ACACGGCCTGGATAGCAACAT |
|            | Reverse: AGAGCAGTATCCCAAGCATT  |
